# Supplementary material for: Changes in Polyphenolics during Storage of Products Prepared with Freeze-Dried Wild Blueberry Powder
Source: MDPI journal article supplement (doi:10.3390/foods9040466), 2020-04-09
Supplement: s1 [file s1]

# SUPPLEMENTARY FIGURES

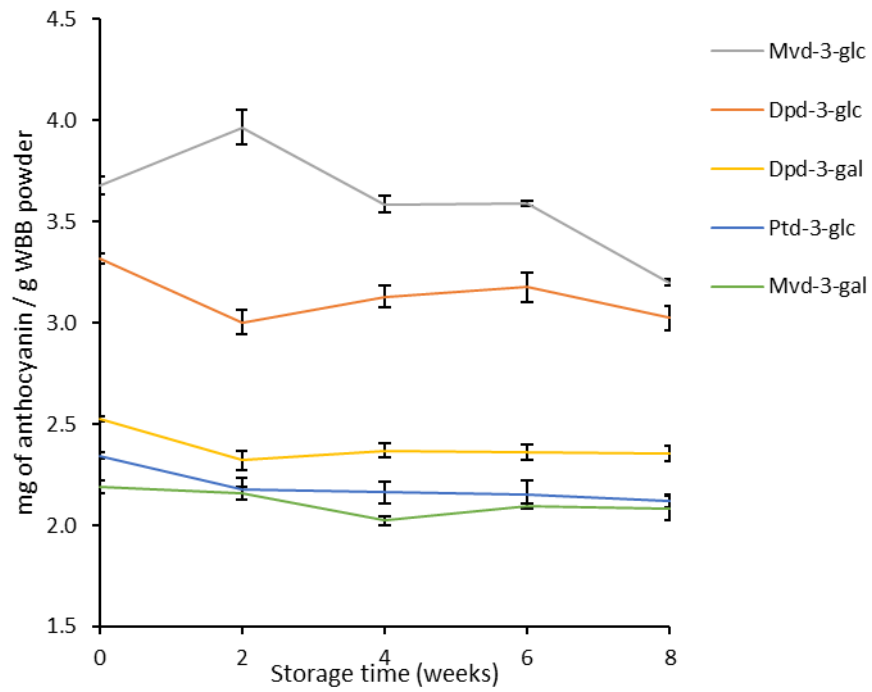

**Figure S1.** Five major individual anthocyanin content of blueberry ice pop stored at -20 °C over eight weeks. Bars represent standard error of the mean (n=3/time point). Anthocyanidins: Dpd = delphinidin, Mvd = malvidin, Ptd = petunidin. Sugar moiety: gal = galactose, glc = glucose.

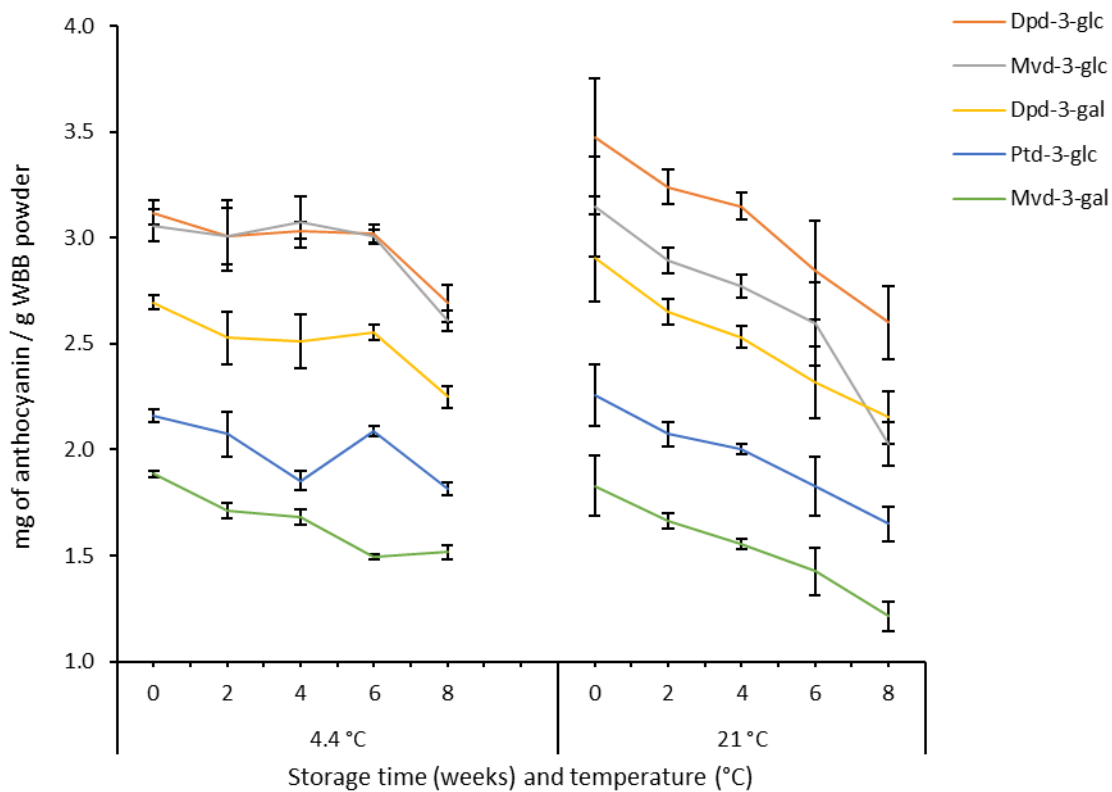

**Figure S2.** Five major individual anthocyanin content of blueberry oatmeal bar stored at 4.4 and 21 °C over eight weeks. Bars represent standard error of the mean (n=3/time point). Anthocyanidins: Dpd = delphinidin, Mvd = malvidin, Ptd = petunidin. Sugar moiety: gal = galactose, glc = glucose.

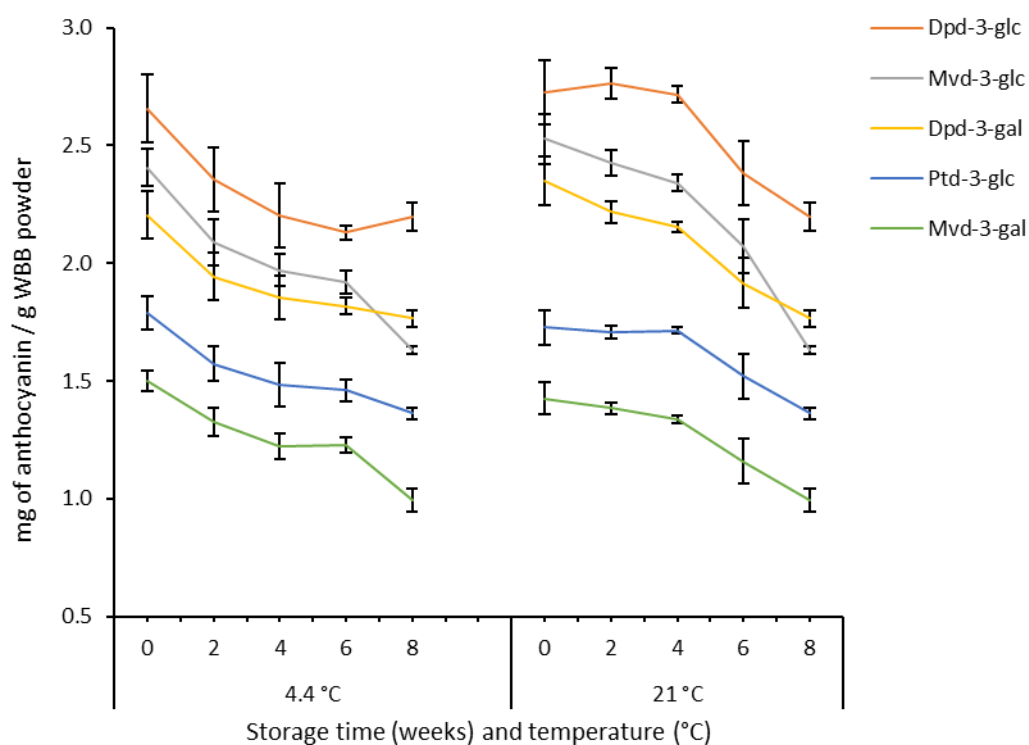

**Figure S3.** Five major individual anthocyanin content of blueberry graham cracker cookie stored at 4.4 and 21 °C over eight weeks. Bars represent standard error of the mean (n=3/time point). Anthocyanidins: Dpd = delphinidin, Mvd = malvidin, Ptd = petunidin. Sugar moiety: gal = galactose, glc = glucose.

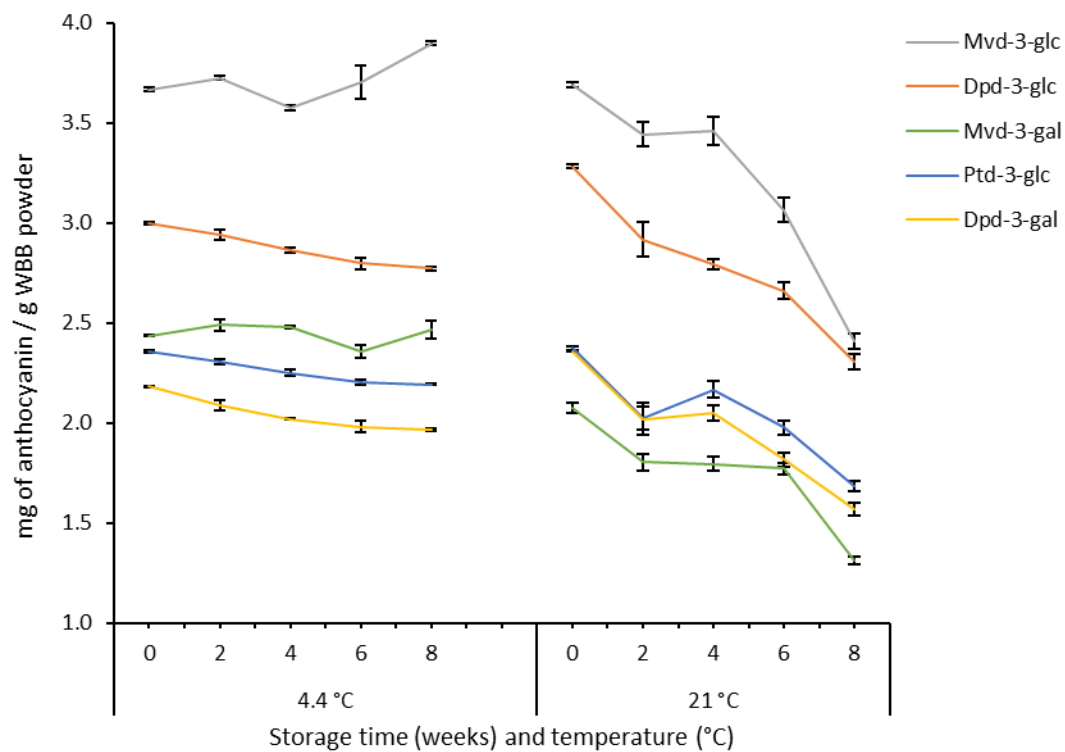

**Figure S4.** Five major individual anthocyanin content of blueberry juice stored at 4.4 and 21 °C over eight weeks. Bars represent standard error of the mean (n=3/time point). Anthocyanidins: Dpd = delphinidin, Mvd = malvidin, Ptd = petunidin. Sugar moiety: gal = galactose, glc = glucose.

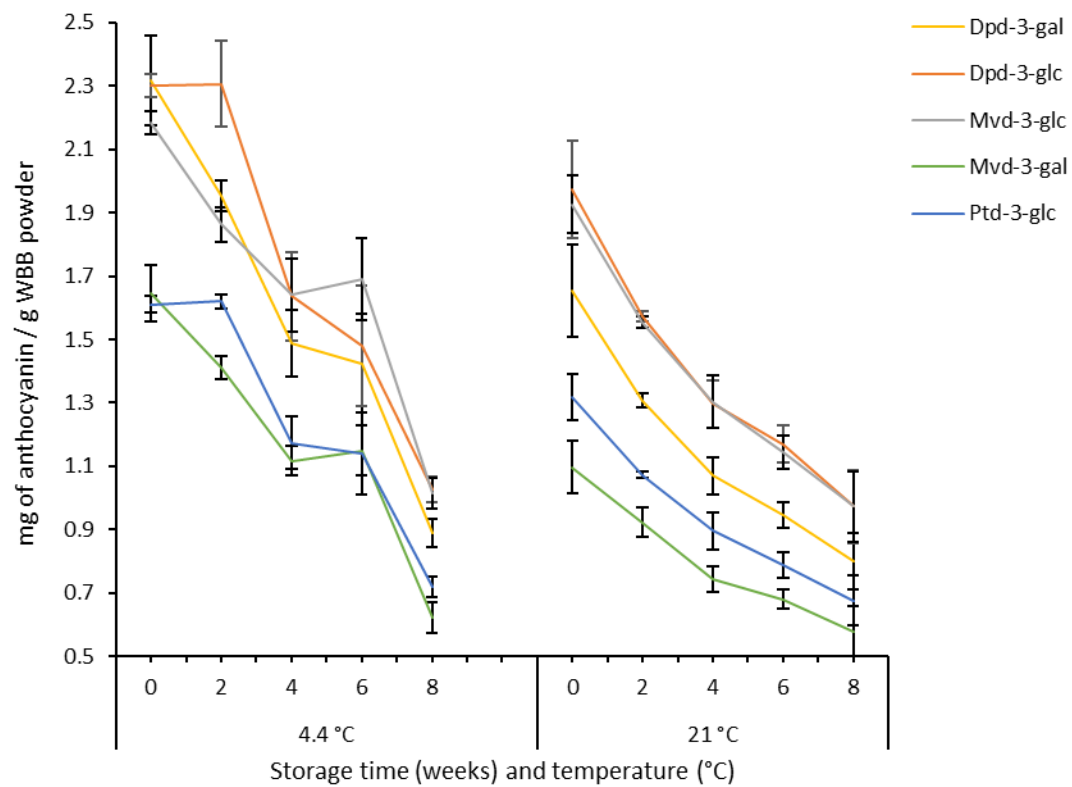

**Figure S5.** Five major individual anthocyanin content of blueberry gummy stored at 4.4 and 21 °C over eight weeks. Bars represent standard error of the mean (n=3/time point). Anthocyanidins: Dpd = delphinidin, Mvd = malvidin, Ptd = petunidin. Sugar moiety: gal = galactose, glc = glucose.
